# Supplementary material for: Public-Academic Partnerships: Evidence-Based Implementation: The Role of Sustained Community-Based Practice and Research Partnerships
Source: Atypon-hosted journal article supplement (doi:10.1176/appi.ps.201200032), 2012-03-01
Supplement: pss6303_0205_ds.pdf [file pss6303_0205_ds.pdf]

**Replicating Effective Programs-Facilitation Framework based on the Recovery-Oriented Collaborative Care Academic-Community Partnership**

| Phase                     | <b>Replicating Effective Programs-Components and Facilitation Additions</b>                                                                                                                                                                                                                                                                                                                                                                                                                                                                                                                                                                                                                                                                                                                                                                                                                                                                                                                                                                                                                                                                                                                                                            |
|---------------------------|----------------------------------------------------------------------------------------------------------------------------------------------------------------------------------------------------------------------------------------------------------------------------------------------------------------------------------------------------------------------------------------------------------------------------------------------------------------------------------------------------------------------------------------------------------------------------------------------------------------------------------------------------------------------------------------------------------------------------------------------------------------------------------------------------------------------------------------------------------------------------------------------------------------------------------------------------------------------------------------------------------------------------------------------------------------------------------------------------------------------------------------------------------------------------------------------------------------------------------------|
| Pre-conditions            | <p><b><u>Replicating Effective Programs:</u>*</b></p> <ul style="list-style-type: none"> <li>• Identify evidence-based practices (EBP) in the area of interest</li> <li>• Draft EBP intervention package with culturally appropriate components</li> <li>• Refine package, training, and technical assistance (TA) approaches</li> </ul> <p><b><u>Expanded Facilitation Components to Enhance Organizational Incentives:</u></b></p> <ul style="list-style-type: none"> <li>• Conduct needs assessment to identify health care setting’s current priorities, and organizational barriers and facilitators to implementing EBP.</li> <li>• Establish EBP implementation goals and align with similar performance goals at site.</li> <li>• Establish measurement-based care tools at health care settings and feedback for local providers- e.g., changes in outcomes and consumer stories in feedback.</li> </ul> <p><b><u>Expand Facilitation Components to Enhance Financial Incentives:</u></b></p> <ul style="list-style-type: none"> <li>• Establish, publicize measureable indicators that reflect EBP components, aligned with existing performance measures across region, as well as consumer endorsement stories.</li> </ul> |
| Pre-Implementation        | <p><b><u>Replicating Effective Programs:</u></b></p> <ul style="list-style-type: none"> <li>• Identify appropriate site personnel to implement EBP</li> <li>• Orientation: in-services on EBP</li> </ul> <p><b><u>Expand Facilitation Components to Enhance Organizational Incentives:</u></b></p> <ul style="list-style-type: none"> <li>• Identify program champions who mobilize support for EBP, establish ongoing communications</li> </ul>                                                                                                                                                                                                                                                                                                                                                                                                                                                                                                                                                                                                                                                                                                                                                                                       |
| Implementation            | <p><b><u>Replicating Effective Programs:</u></b></p> <ul style="list-style-type: none"> <li>• Structured training in EBP</li> <li>• Technical assistance to review milestones, work through implementation barriers</li> <li>• Evaluation: process, outcomes, fidelity</li> </ul> <p><b><u>Expanded Facilitation Components to Enhance Organizational Incentives:</u></b></p> <ul style="list-style-type: none"> <li>• Customize on-site or distance training for health care setting so that other skills are covered (e.g., clinical skills based on EBP that apply to other treatment modalities)</li> <li>• Publicize program at site and beyond</li> <li>• Establish internal facilitator to lead meetings at agency with leadership and staff.</li> <li>• Check-in periodically with internal facilitators to assess progress; align with practice’s goals.</li> </ul> <p><b><u>Expand Facilitation Components to Enhance Financial Incentives:</u></b></p> <ul style="list-style-type: none"> <li>• Establish cross-functional team of opinion leaders to promote EBP business case, hold regular meetings and conduct follow-up organizational assessments at sites.</li> </ul>                                                |
| Maintenance and Evolution | <p><b><u>Replicating Effective Programs:</u></b></p> <ul style="list-style-type: none"> <li>• Develop and refine business case for EBP</li> <li>• Health care setting institutionalizes EBP as standard practice</li> <li>• Prepare EBP package for national dissemination</li> </ul> <p><b><u>Expand Facilitation Components to Enhance Financial Incentives:</u></b></p> <ul style="list-style-type: none"> <li>• Cross-functional team and sites develop, market business plan to sustain EBP (e.g., reimbursement strategies, discussion of trade-offs with initial investment, long-term ROI)</li> <li>• Leverage EBP with existing programs that are reimbursable; continue publicizing EBP.</li> <li>• Cross-functional team obtains input on business case aligning EBP activities with billing codes.</li> </ul>                                                                                                                                                                                                                                                                                                                                                                                                              |

\*Replicating Effective Programs Framework, based on the Centers for Disease Control and Prevention Division of HIV/AIDS Prevention’s Research to Practice Framework.
